# Supplementary material for: Novel triazine derivatives with deep LUMO energy levels as the electron-accepting components of exciplexes
Source: Royal Society of Chemistry journal article supplement (doi:10.1039/d0tc04751a), 2020-12-09
Supplement: d0tc04751a1.pdf [file d0tc04751a1.pdf]

Electronic Supplementary Information

## Novel triazine derivatives with deep LUMO energy levels as the electron-accepting components of exciplexes

Jing-Guo,<sup>a</sup> Cai-Jun Zheng,<sup>\*a</sup> Ke Ke,<sup>a,b</sup> Ming Zhang,<sup>a,b</sup> Hao-Yu Yang,<sup>a</sup> Jue-Wen Zhao,<sup>a</sup> Ze-Yu He,<sup>a</sup> Hui Lin,<sup>a</sup> Si-Lu Tao,<sup>\*a</sup> and Xiao-Hong Zhang<sup>b</sup>

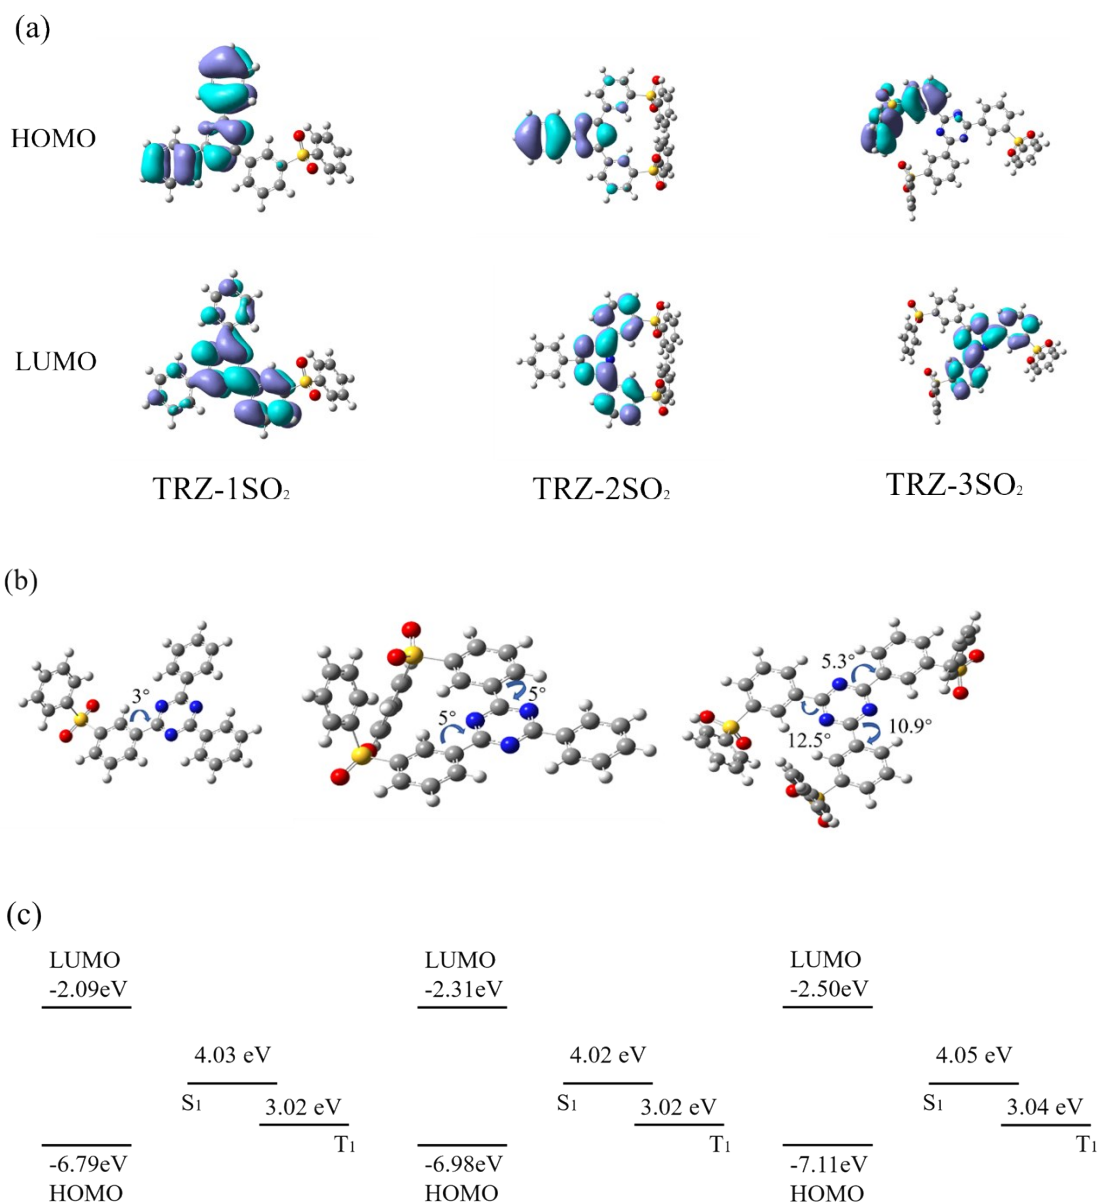

**Figure S1.** a) Frontier orbital distributions (HOMO/LUMO) with optimized ground state structures; b) The twisted angles between the triazine core and diphenylsulfone; c) Calculated energy levels of TRZ-1SO<sub>2</sub>, TRZ-2SO<sub>2</sub> and TRZ-3SO<sub>2</sub>.

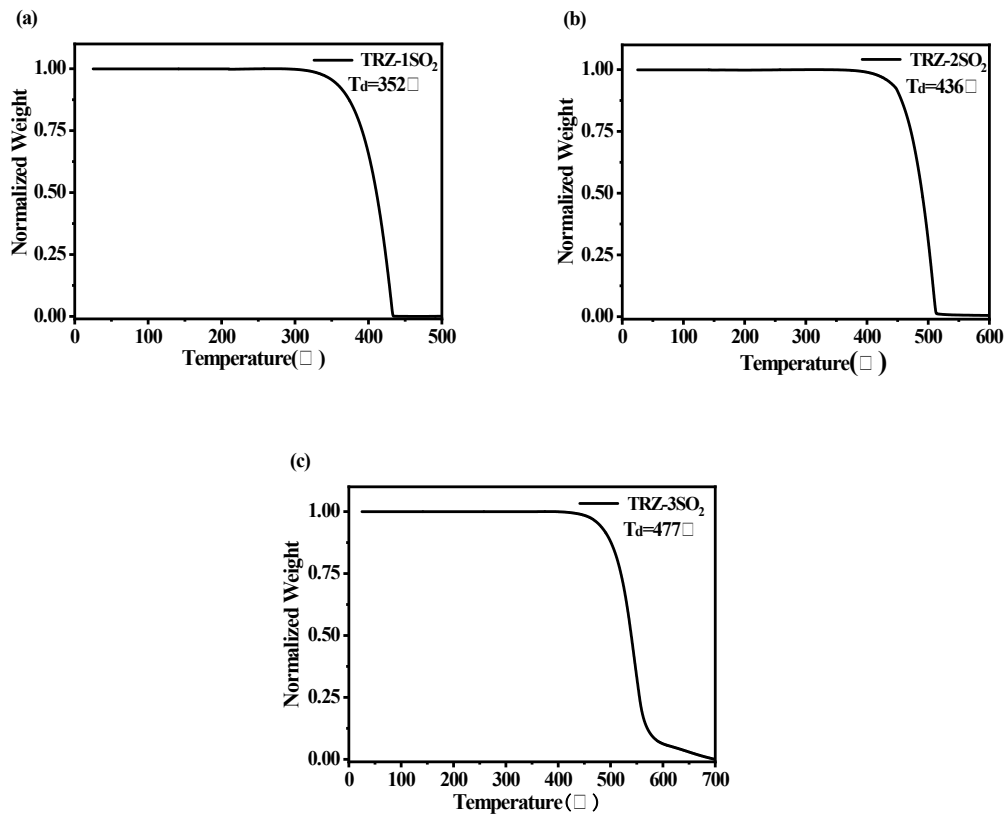

**Figure S2.** The TGA curves of TRZ-1SO<sub>2</sub>, TRZ-2SO<sub>2</sub> and TRZ-3SO<sub>2</sub> (the decomposition temperatures (T<sub>d</sub>) were estimated with 5% weight loss).

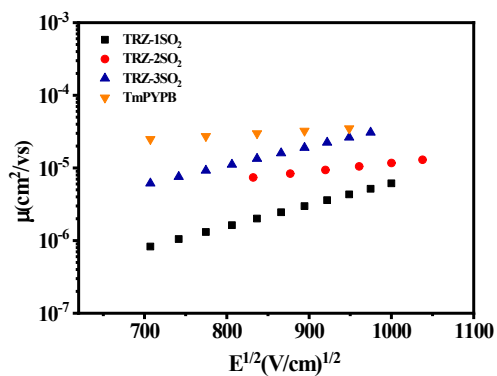

**Figure S3.** The electron mobilities of TmPyPB, TRZ-1SO<sub>2</sub>, TRZ-2SO<sub>2</sub> and TRZ-3SO<sub>2</sub> plotted with respect E<sup>1/2</sup>.

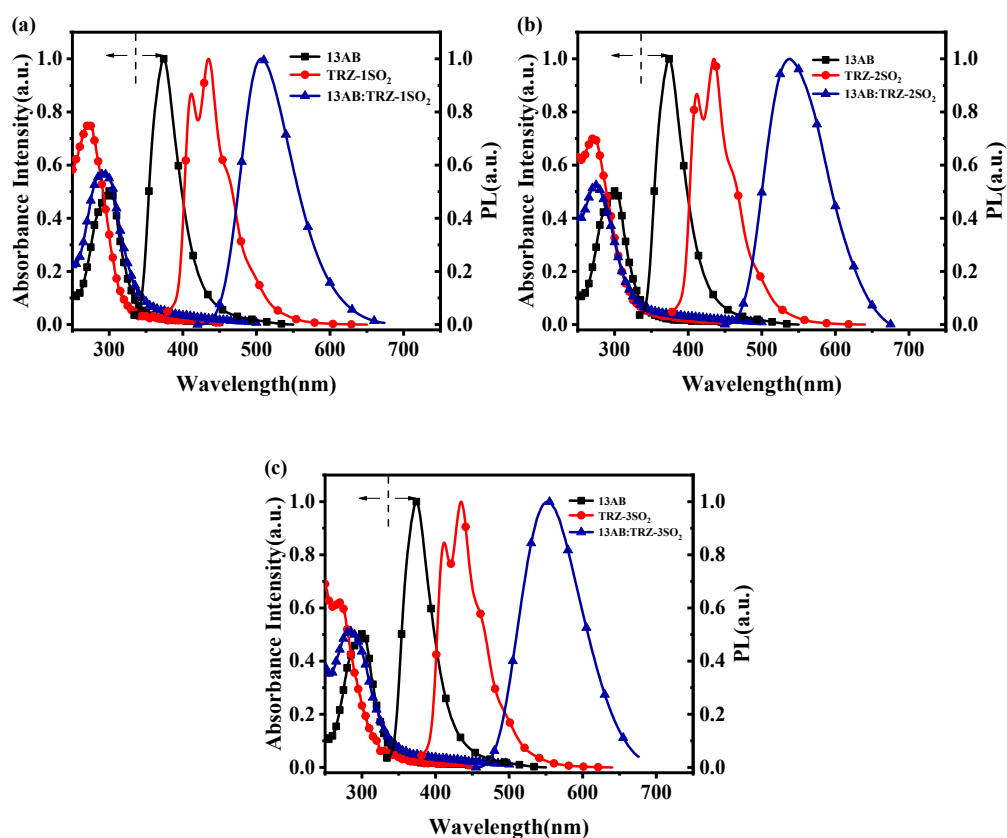

**Figure S4.** UV-vis absorption and photoluminescence spectra in thin films at room temperature: (a) 13AB, TRZ-1SO<sub>2</sub> and 13AB:TRZ-1SO<sub>2</sub>; (b) 13AB, TRZ-2SO<sub>2</sub> and 13AB:TRZ-2SO<sub>2</sub>; (c) 13AB, TRZ-3SO<sub>2</sub> and 13AB:TRZ-3SO<sub>2</sub>.

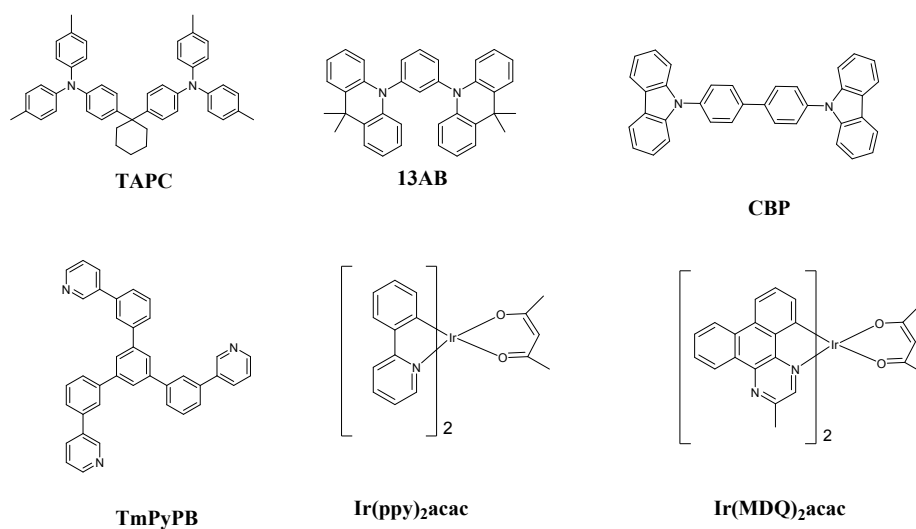

**Figure S5.** The molecular structures of the materials used in this work.

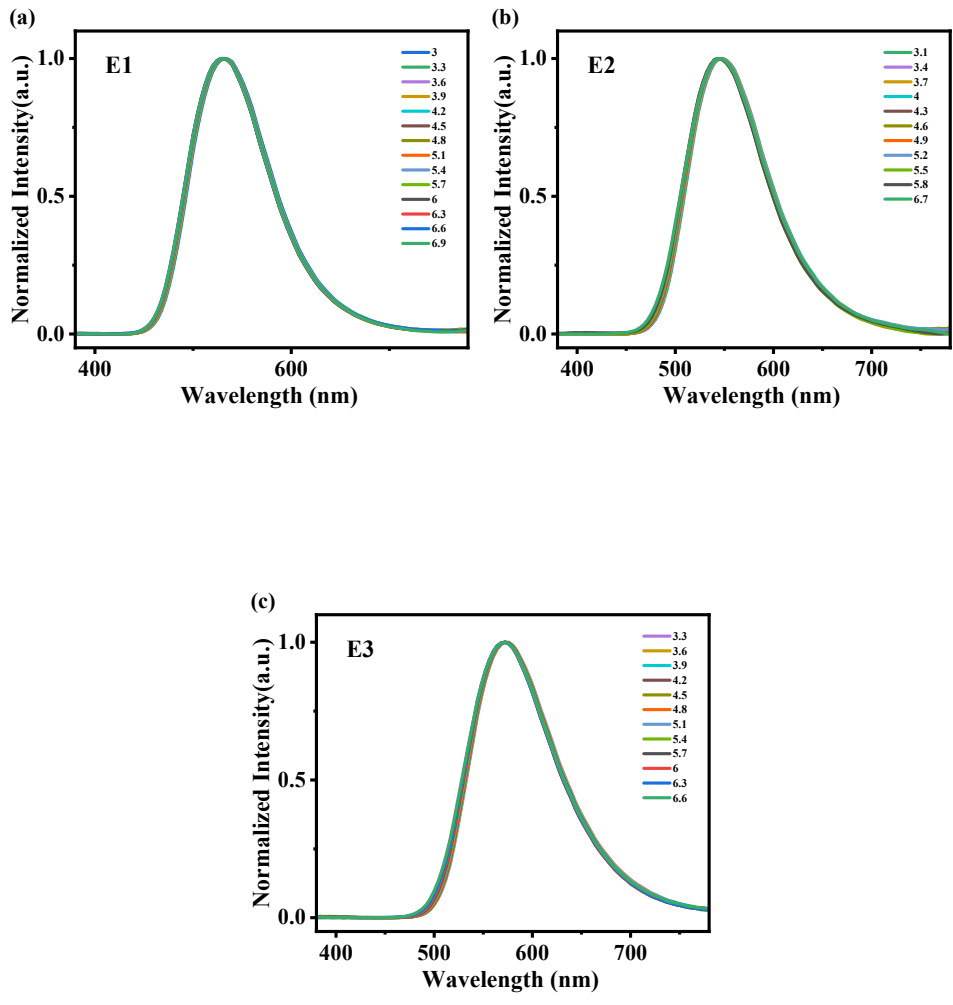

Figure S6. The EL spectra of devices E1, E2 and E3 at different voltages.

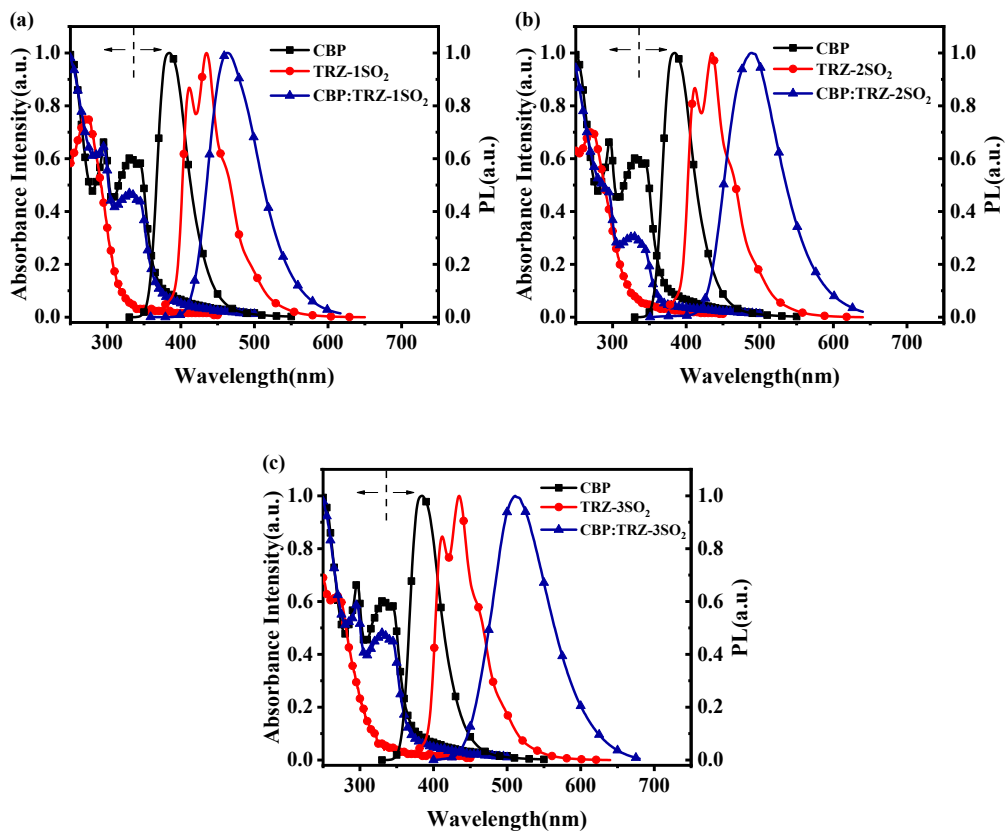

**Figure S7.** UV-vis absorption and photoluminescence spectra in chlorobenzene solid films at 300K : (a) CBP, TRZ-1SO<sub>2</sub> and CBP:TRZ-1SO<sub>2</sub>; (b) CBP, TRZ-2SO<sub>2</sub> and CBP:TRZ-2SO<sub>2</sub>; (c) CBP, TRZ-3SO<sub>2</sub> and CBP:TRZ-3SO<sub>2</sub>.

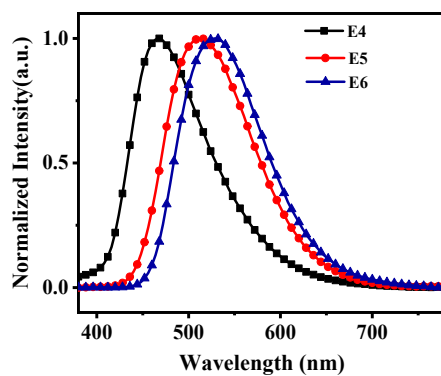

**Figure S8.** The EL spectra of devices E4, E5 and E6.

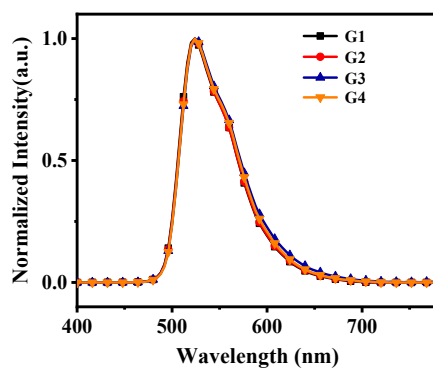

**Figure S9.** The EL spectra of devices G1, G2, G3, and G4.

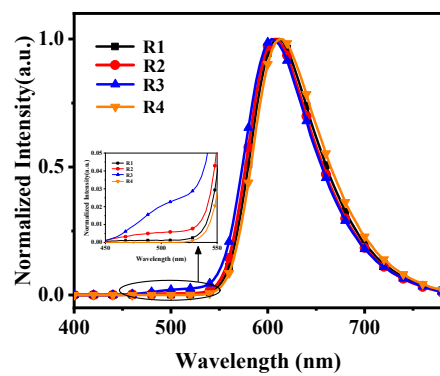

**Figure S10.** The EL spectra of devices R1, R2, R3, and R4. Inset: enlarged plot between 450nm and 550nm.

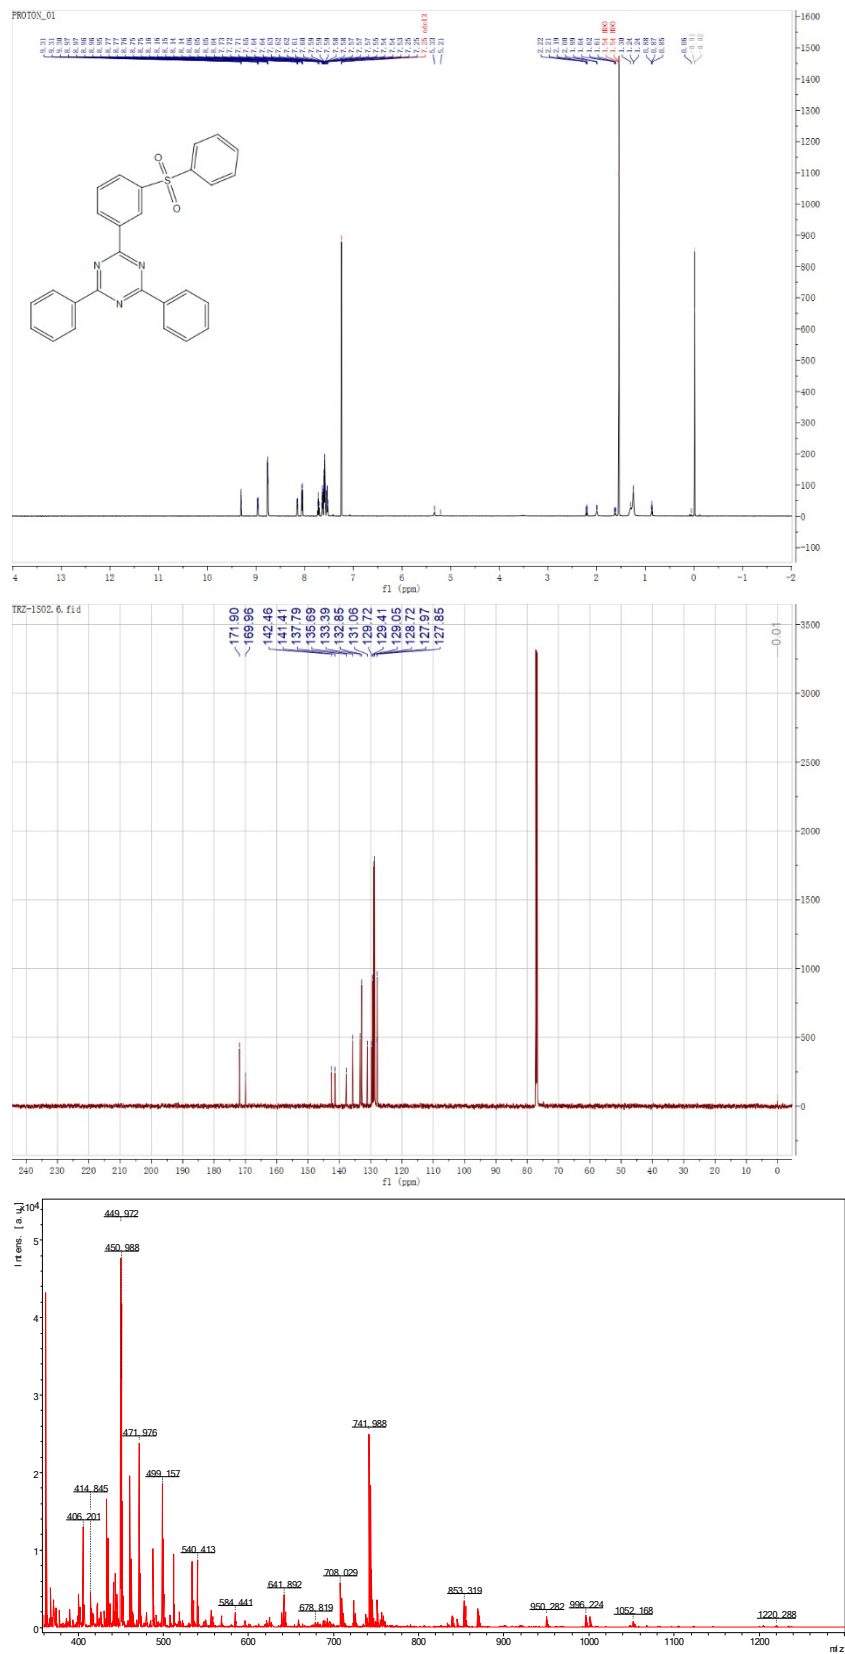

Figure S11.  $^1\text{H}$  NMR,  $^{13}\text{C}$  NMR and mass spectra of TRZ-1SO<sub>2</sub>.

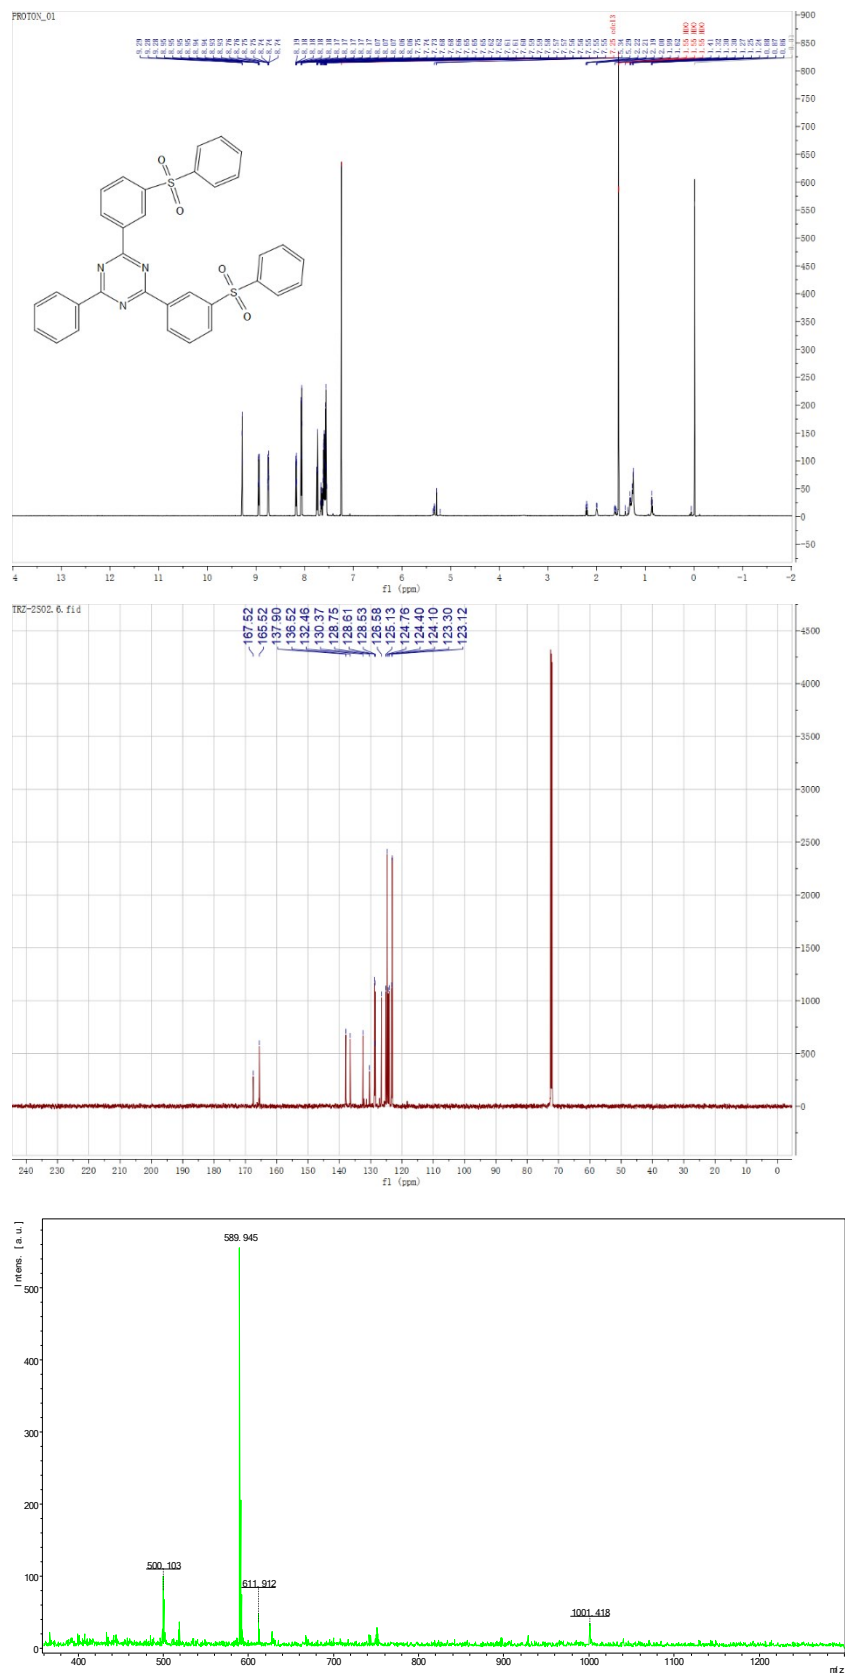

**Figure S12.** <sup>1</sup>H NMR, <sup>13</sup>C NMR and mass spectra of TRZ-2SO<sub>2</sub>.



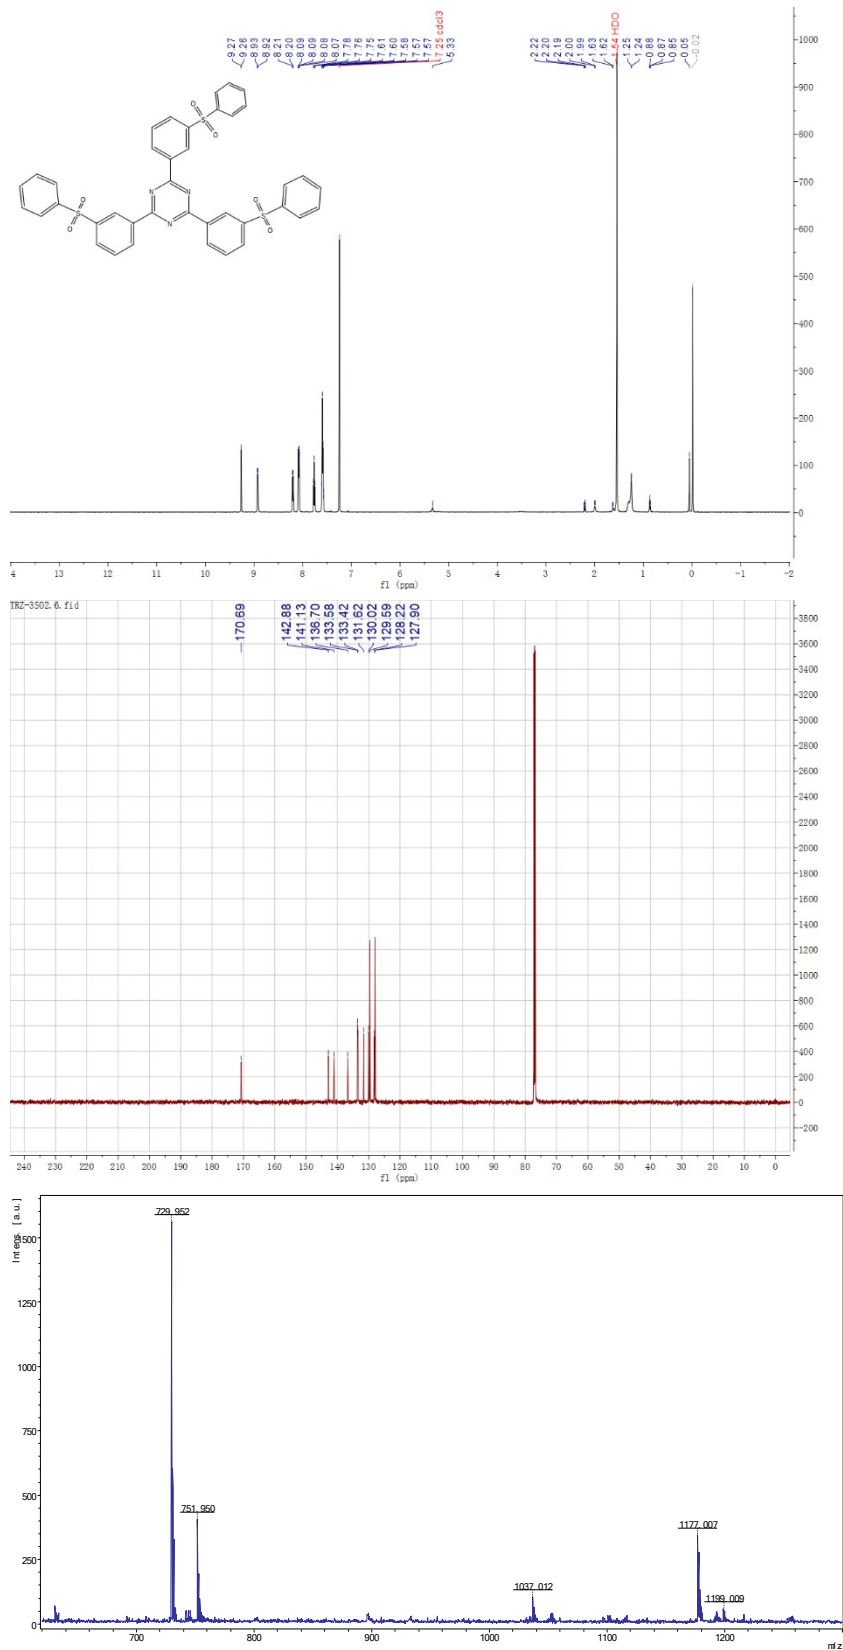

Figure S13. <sup>1</sup>H NMR, <sup>13</sup>C NMR and mass spectra of TRZ-3SO<sub>2</sub>.
